# Supplementary material for: Impact of Factor Xa inhibitors on cardiovascular events in older patients with nonvalvular atrial fibrillation
Source: publisher site journal article supplement (doi:10.18632/aging.206238), 2025-04-10
Supplement: Supplementary file [file aging-v17-206238-supplementary-material-SD1.pdf]

**SUPPLEMENTARY FIGURE**

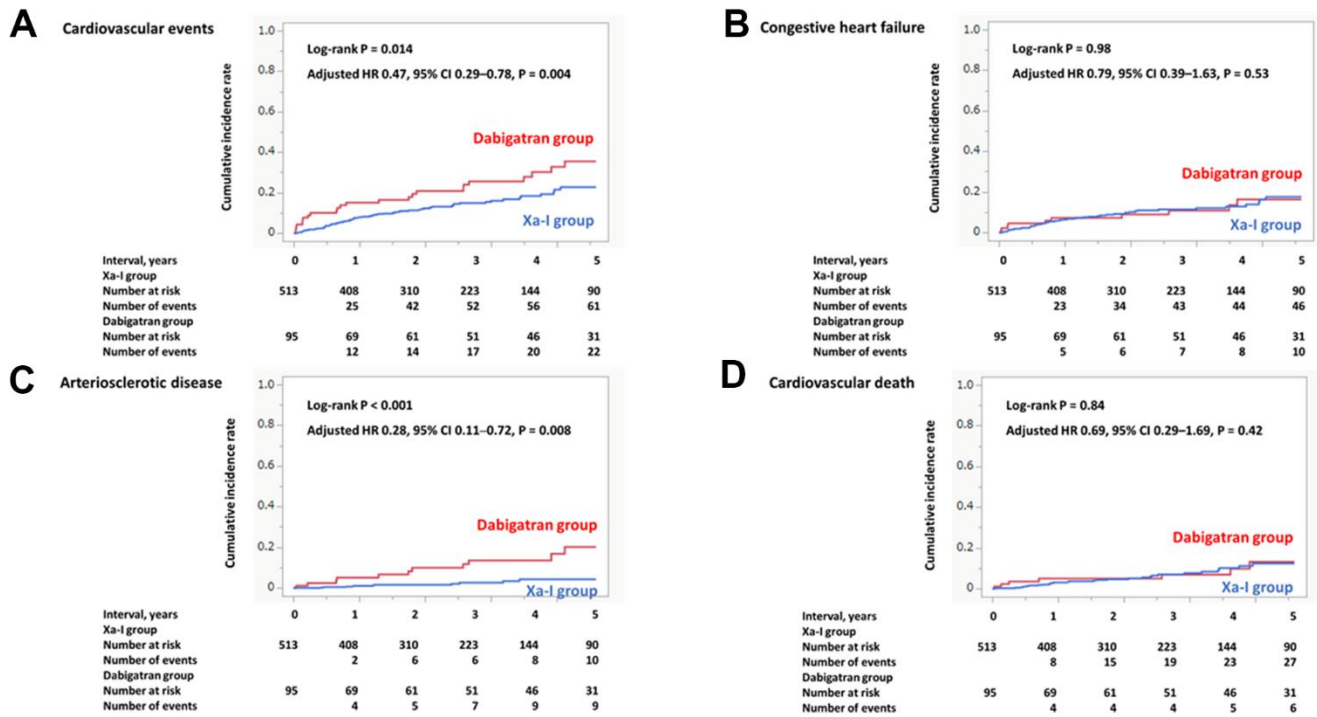

**Supplementary Figure 1. Incidence of primary and secondary outcomes: Xa-I vs. dabigatran (total original cohort).** The incidence of cardiovascular events and arteriosclerotic disease was significantly lower in the Xa-I group than in the dabigatran group. The incidence of congestive heart failure and cardiovascular death did not differ between the groups. Abbreviations: CI, confidence interval; HR, hazard ratio; Xa-I, Factor Xa inhibitor.
